# Supplementary material for: Construction of A Triple-Stimuli-Responsive System Based on Cerium Oxide Coated Mesoporous Silica Nanoparticles
Source: PubMed Central journal article supplement (PMC5150981; doi:10.1038/srep38931), 2016-12-12
Supplement: srep38931-s1.pdf [file srep38931-s1.pdf]

## Supporting Information

### Construction of A Triple-Stimuli-Responsive System Based on Cerium Oxide Coated

#### Mesoporous Silica Nanoparticles

Jia Wen<sup>1</sup>, Kui Yang<sup>1</sup>, Yongqian Xu<sup>1</sup>, Hongjuan Li<sup>1</sup>, Fengyu Liu<sup>2,\*</sup> and Shiguo Sun<sup>1,\*</sup>

<sup>1</sup>*Shaanxi Key Laboratory of Natural Products & Chemical Biology, College of Science, Northwest A&F University, Yangling, Shaanxi 712100, People's Republic of China*

<sup>2</sup>*State Key Laboratory of Fine Chemicals, School of Chemistry, Dalian University of Technology, No.2 Linggong Road, Ganjingzi, District, Dalian 116023, People's Republic of China*

*\*Corresponding author:*

*Fengyu Liu (liufengyu@dlut.edu.cn)*

*Shiguo Sun (sunsg@nwsuaf.edu.cn)*

#### Table of contents

|                      |   |
|----------------------|---|
| <b>Fig. S1</b> ..... | 2 |
| <b>Fig. S2</b> ..... | 2 |
| <b>Fig. S3</b> ..... | 3 |
| <b>Fig. S4</b> ..... | 3 |
| <b>Fig. S5</b> ..... | 4 |
| <b>Fig. S6</b> ..... | 5 |
| <b>Fig. S7</b> ..... | 5 |

**Fig. S1**

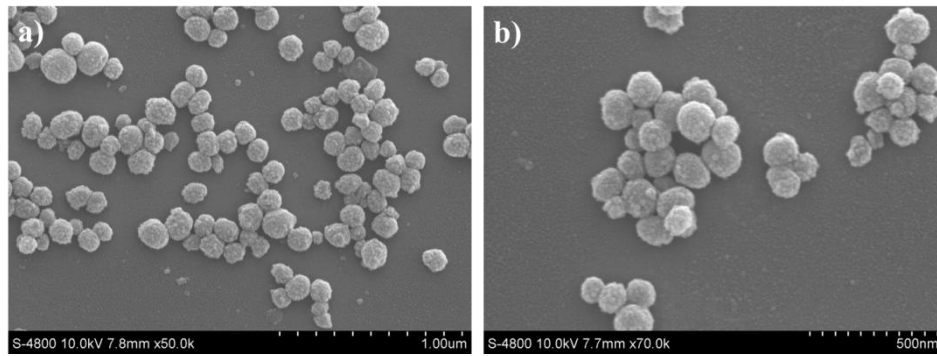

Fig. S1 SEM micrographs of (a) MSN-HP and (b) MSN-HP-DOX.

**Fig. S2**

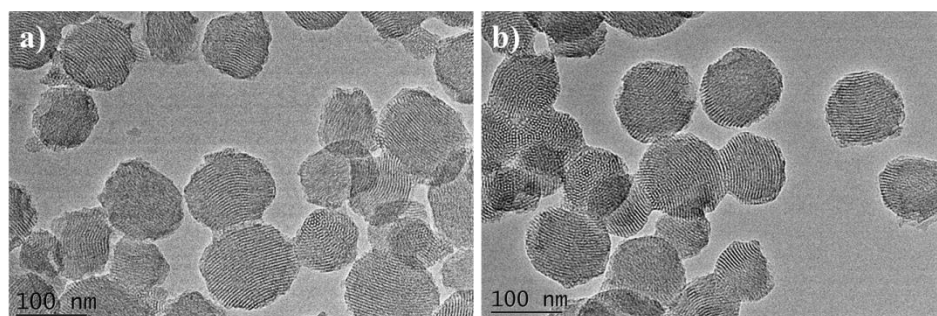

Fig. S2 HRTEM micrographs of (a) MSN-HP and (b) MSN-HP-DOX.

Fig. S3

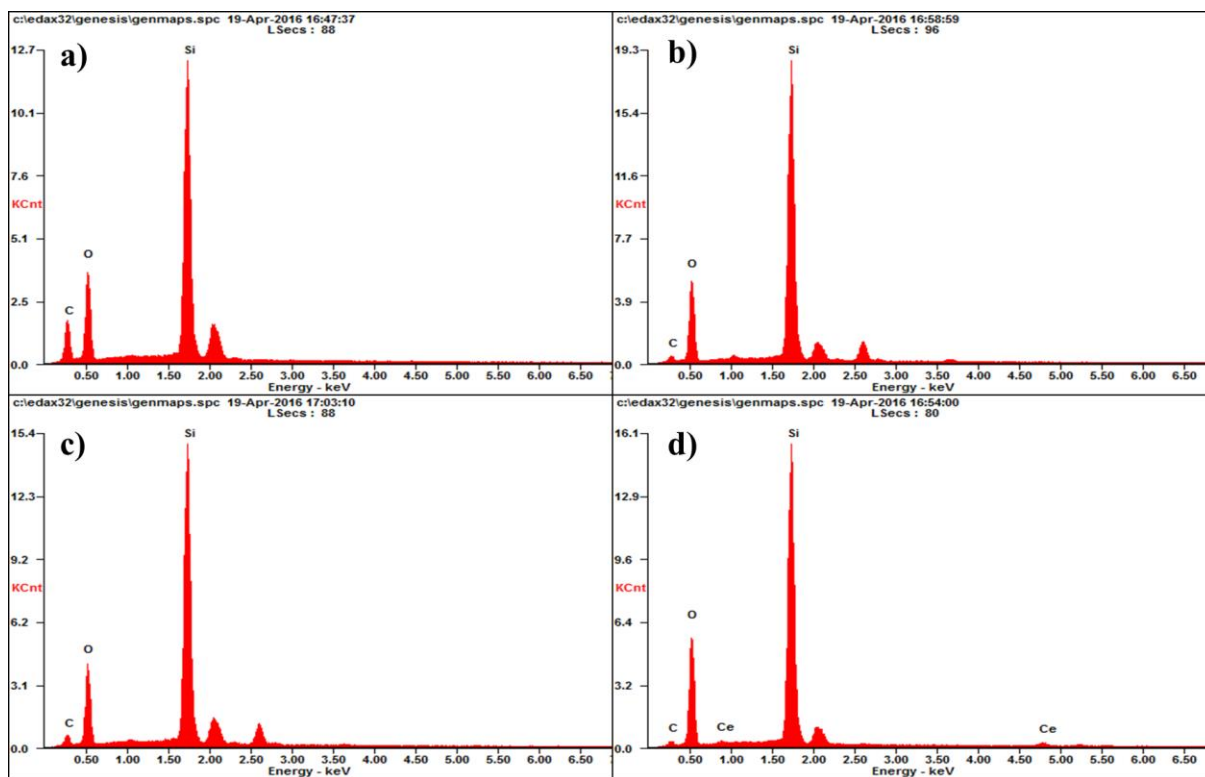

Fig. S3 EDX spectrum of (a) MSN; (b) MSN-HP; (c) MSN-HP-DOX; (d) MSN-HP-DOX@CeO<sub>2</sub>.

Fig. S4

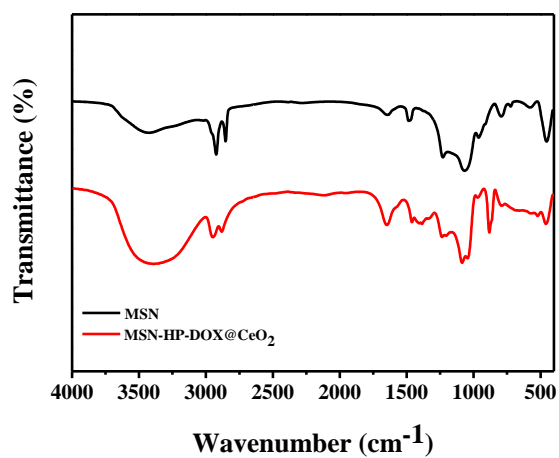

Fig. S4 FTIR spectra of MSN and MSN-HP-DOX@CeO<sub>2</sub>.

Fig. S5

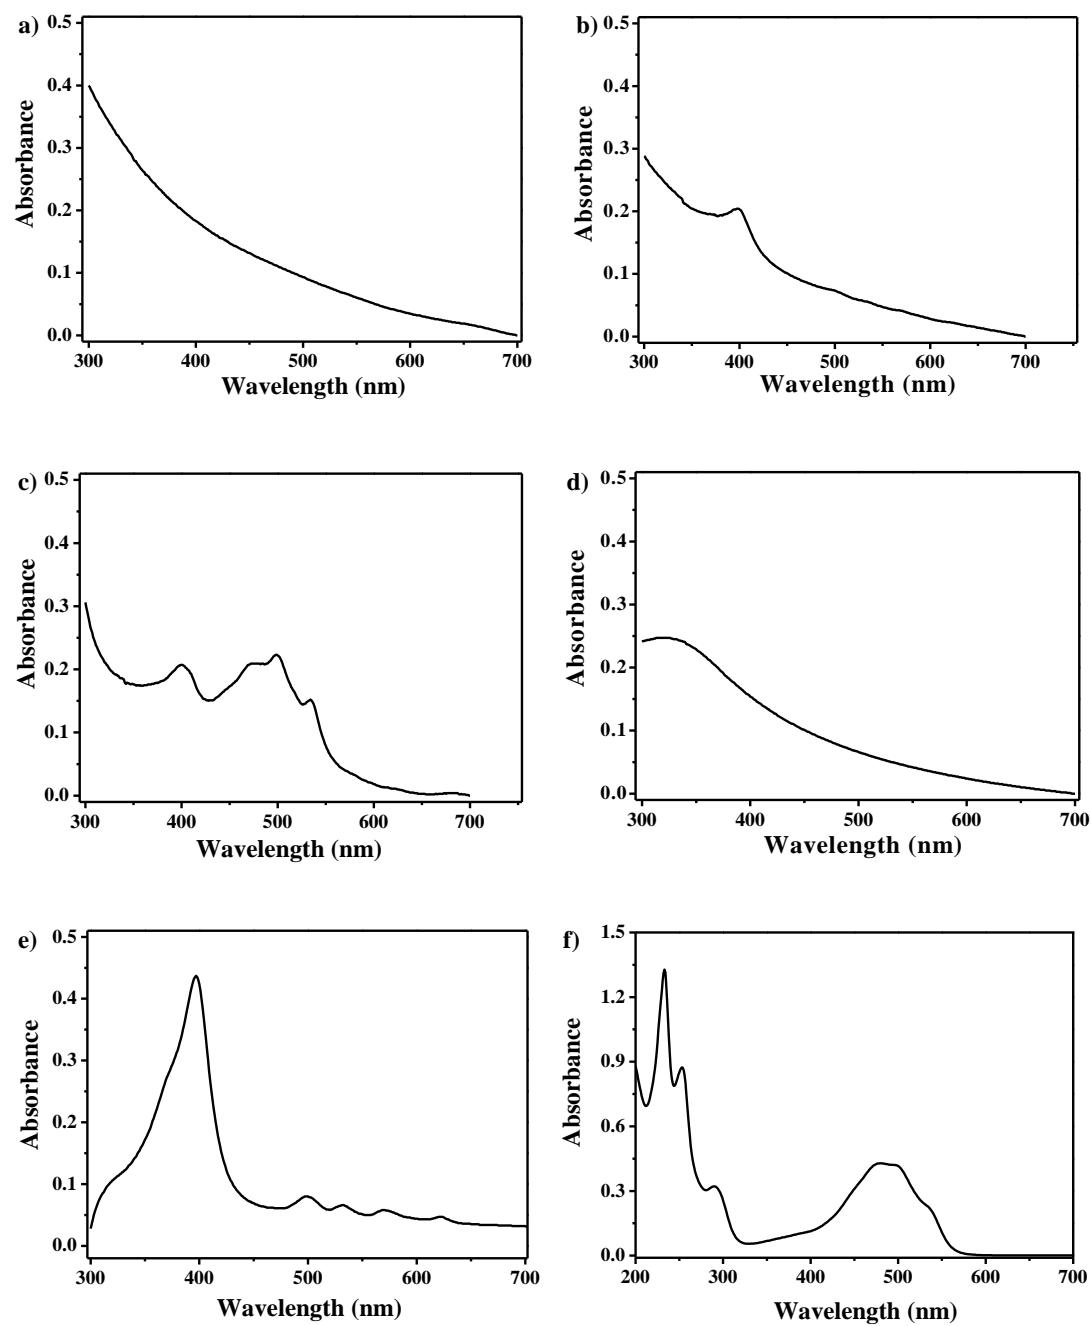

Fig. S5 Absorbance spectrum of MSN (a), MSN-HP (b), MSN-HP-DOX (c), MSN-HP-DOX@CeO<sub>2</sub> (d), HP (e) and DOX (f).

**Fig. S6**

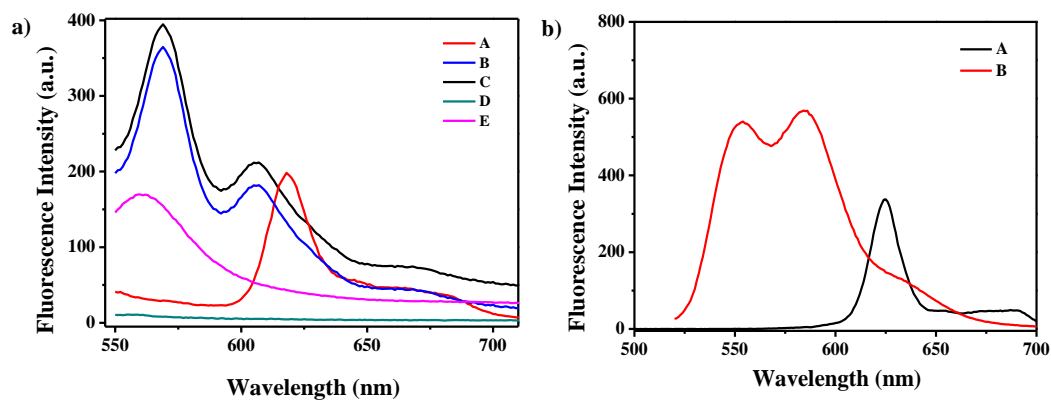

Fig. S6 (a) Emission spectra of MSN-HP (A), MSN-HP-DOX (B), MSN-HP-DOX with the addition of GSH (C), MSN-HP-DOX@CeO<sub>2</sub> without the addition of GSH and irradiation (D), MSN-HP-DOX@CeO<sub>2</sub> with the addition of GSH and irradiation (E)  $\lambda_{\text{ex}} = 480$  nm. (b) Emission spectra of HP (A) and DOX (B)  $\lambda_{\text{ex}} = 480$  nm.

**Fig. S7**

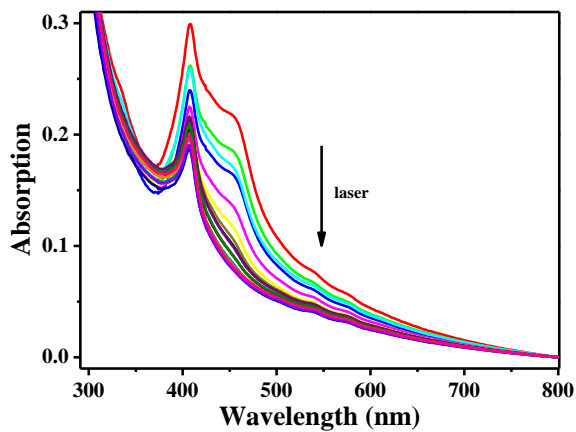

Fig. S7 Determination of the generation of singlet oxygen of MSN-HP-DOX@CeO<sub>2</sub> through the absorption of DPBF upon irradiation by laser at 633 nm for 0 min, 5 min, 10 min, 15 min, 20 min, 25 min, 30 min, 35 min, 40 min, 45 min, 50 min, 55 min, 60 min, 70 min, 80 min, 90 min and 120 min).
